# Supplementary material for: Assessing Bronchodilator Response by Changes in per Cent Predicted Forced Expiratory Volume in One Second
Source: HighWire-hosted journal article supplement (doi:10.1136/jim-2020-001663), 2021-02-11
Supplement: jim-2020-001663supp001_data_supplement.pdf [file jim-2020-001663supp001_data_supplement.pdf]

## Figure legends

**Supplemental Figure S1.** Box-and-whisker plots of delta postBD – preBD percent predicted FEV1 (S1A), FVC (S1B) and FEV1/FVC ratio (S1C) against the new BDR categories in the standard ATS/ERS BDR categories (present vs absent responsiveness). Numbers next to each box plots represent mean values. *Abbreviations and symbols used:* ATS: American Thoracic Society; BD: Bronchodilator; BDR: Bronchodilator Responsiveness; ERS: European Respiratory Society; FEV1: Forced Expiratory Volume in 1 second s; FVC: Forced Vital Capacity; GLI: Global Lung Initiative; %: percent.

## Supplemental Figure S2.

Mean delta PostBD - PreBD % predicted FEV1 in the testing/training, validation 1 and 2 sets by BDR categories. Vertical black and grey lines represent standard errors of the means for each group. Y axis scale: %. *Abbreviations and symbols used:* BD: Bronchodilator; BDR: Bronchodilator Responsiveness; FEV1: Forced Expiratory Volume in 1 second s; %: percent.
