# Supplementary figures and images for: Assessing Bronchodilator Response by Changes in per Cent Predicted Forced Expiratory Volume in One Second
Source: HighWire-hosted journal article supplement (doi:10.1136/jim-2020-001663), 2021-02-11

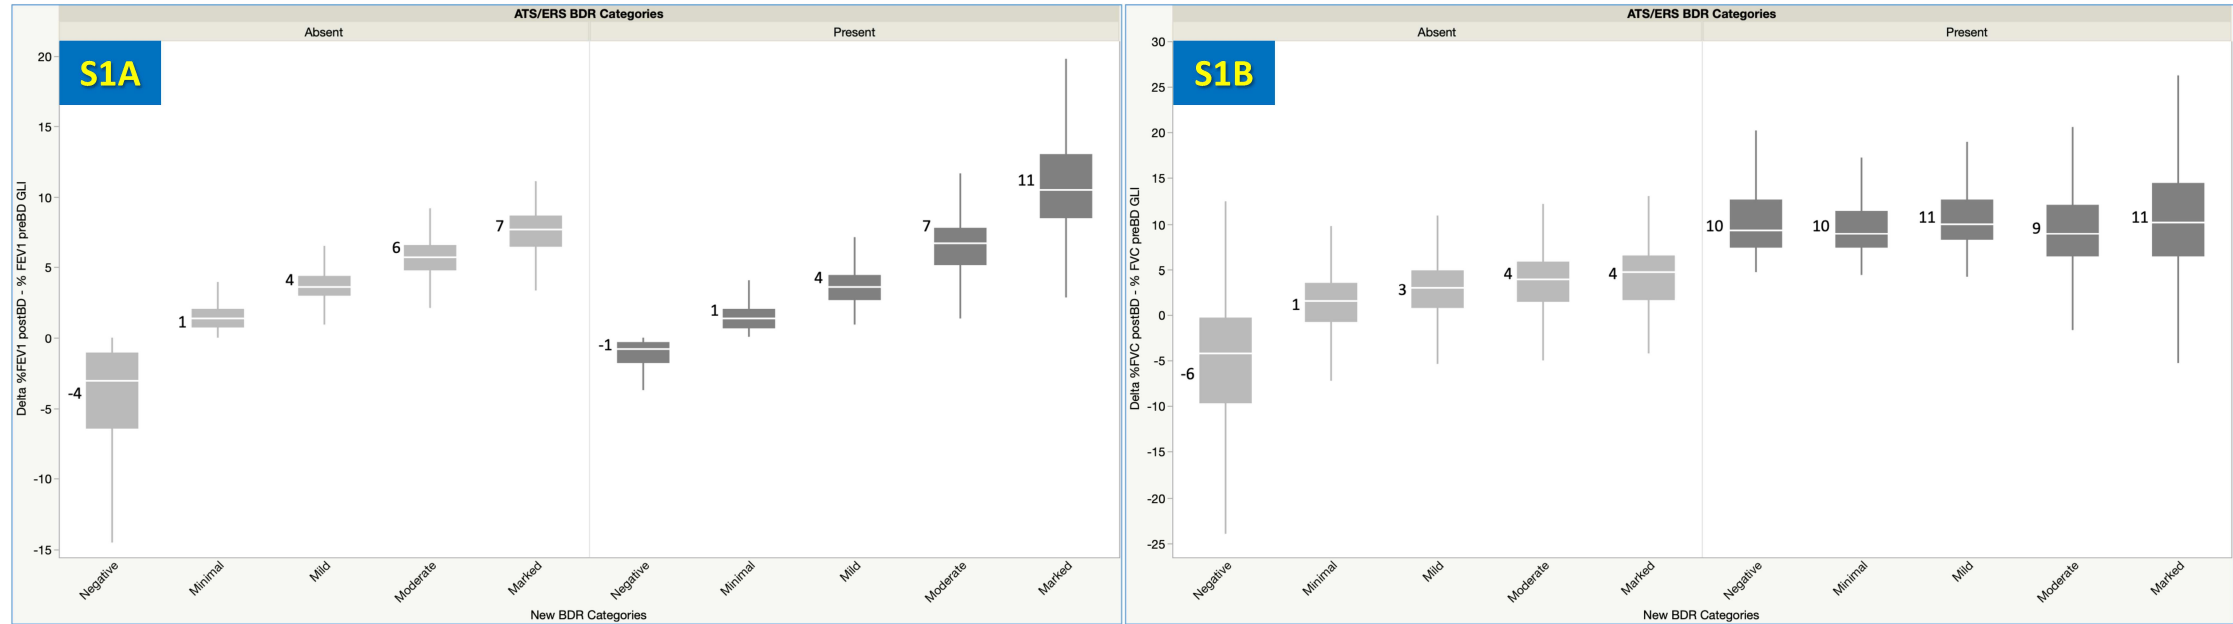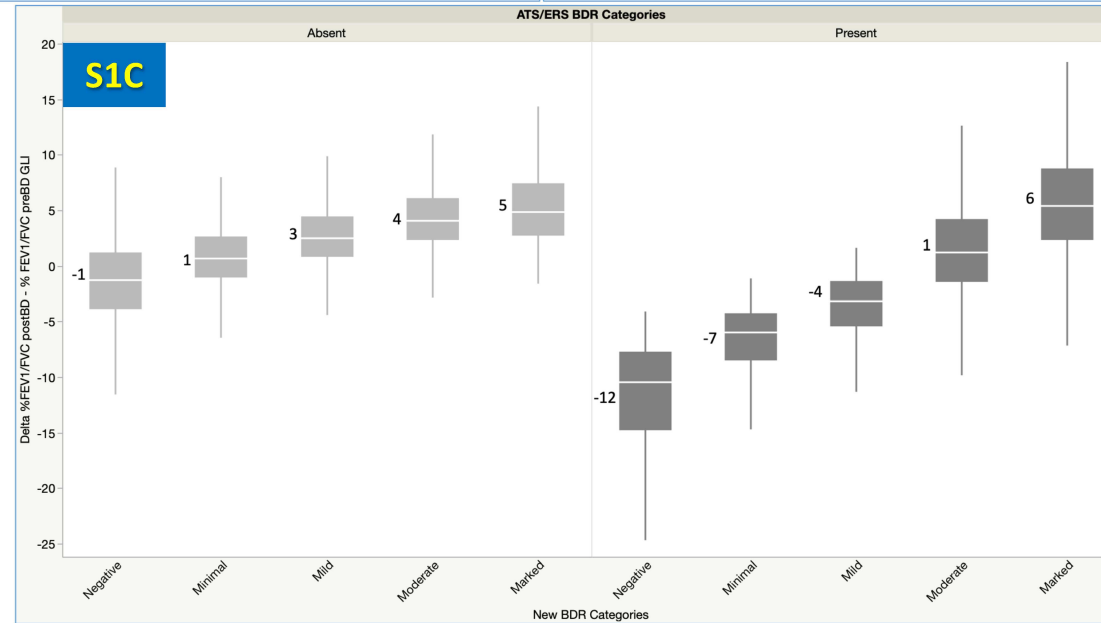

Supplement: jim-2020-001663supp002_data_supplement.pdf [file jim-2020-001663supp002_data_supplement.pdf]

S2

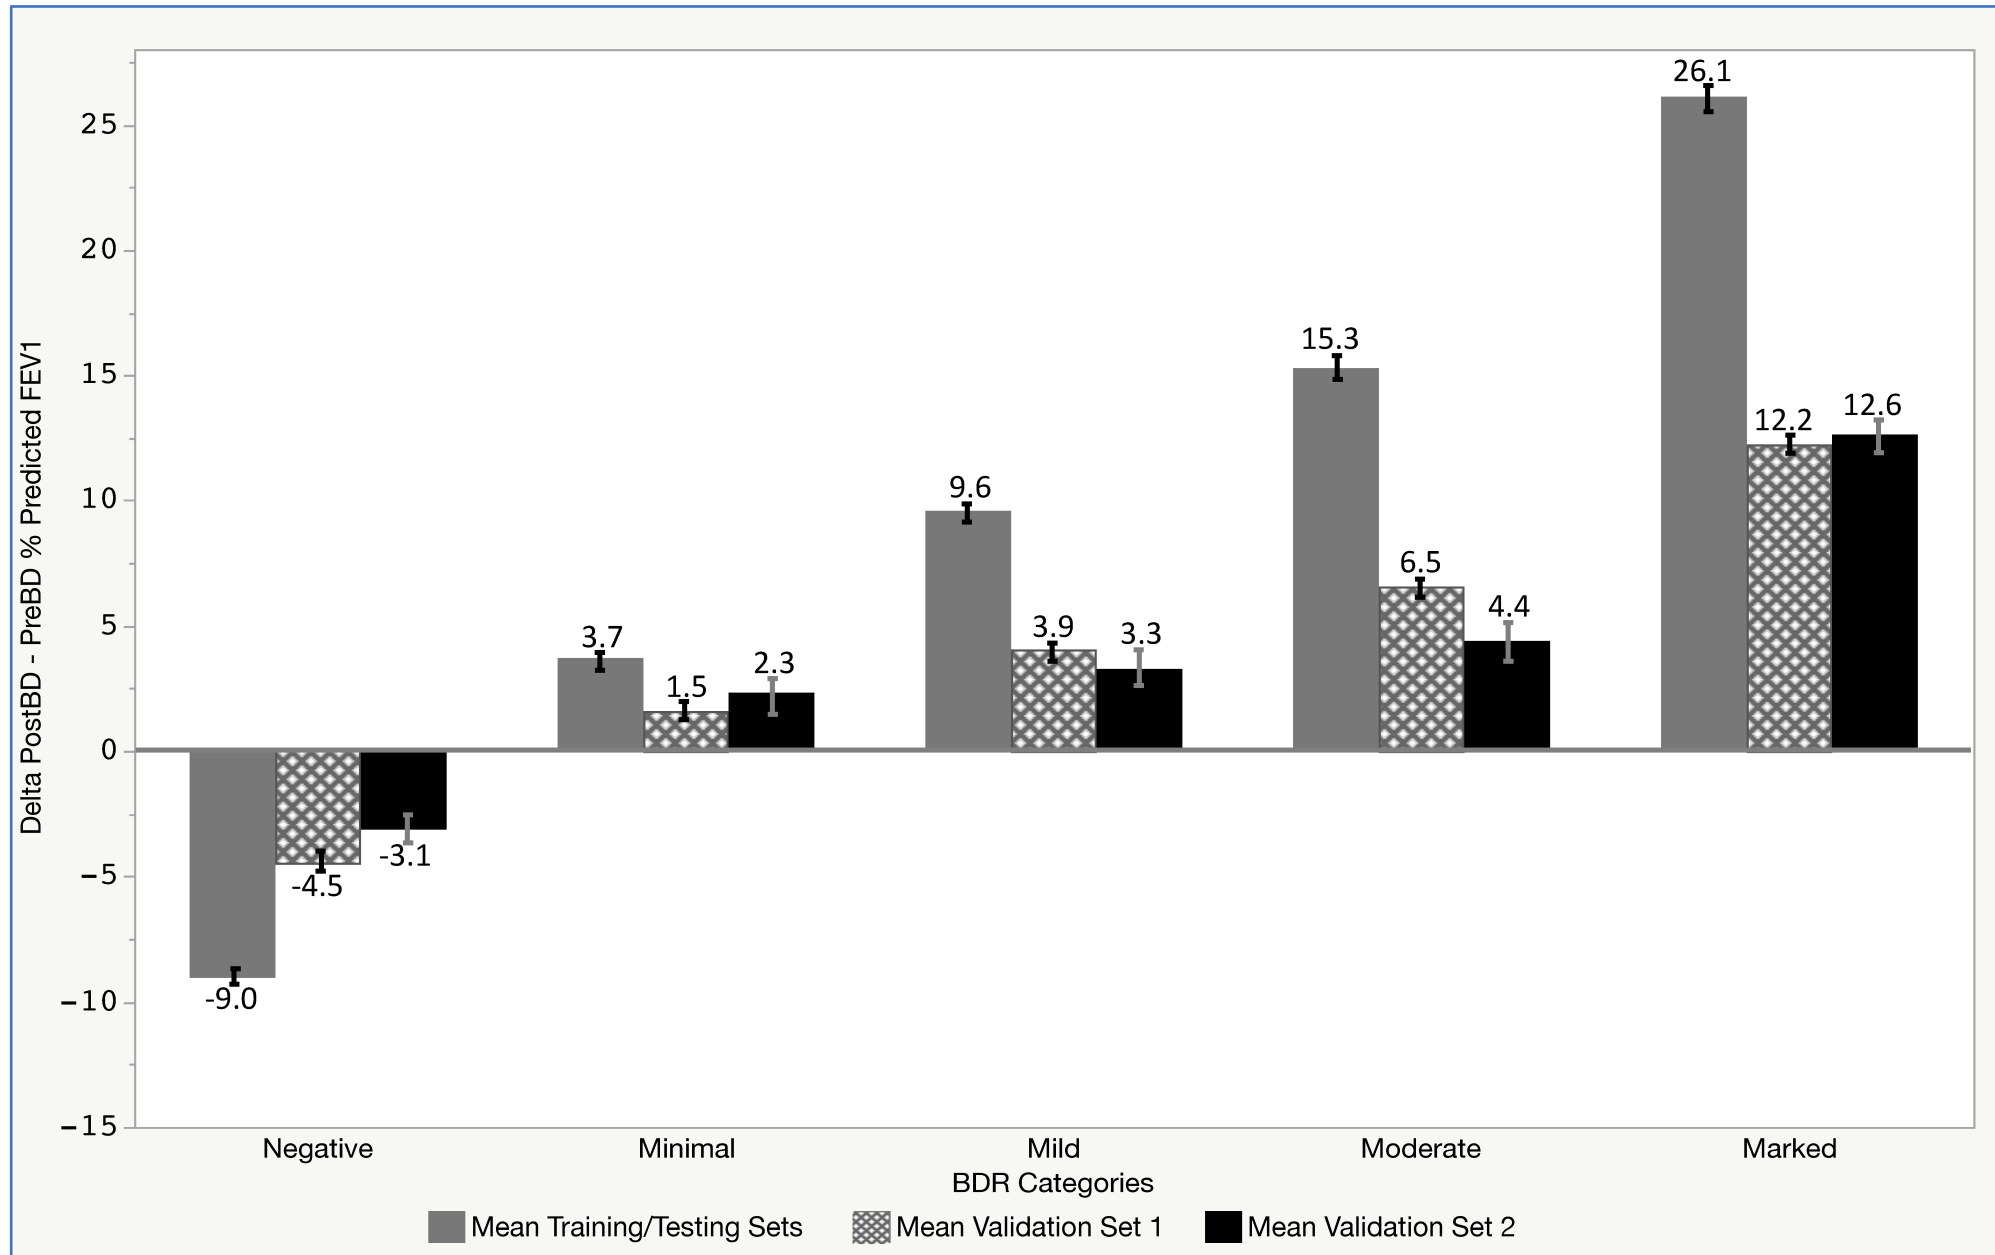

Supplement: jim-2020-001663supp003_data_supplement.pdf [file jim-2020-001663supp003_data_supplement.pdf]
